# Supplementary material for: Risk-Association of CYP11A1 Polymorphisms and Breast Cancer Among Han Chinese Women in Southern China
Source: Int J Mol Sci. 2012 Apr 18;13(4):4896–905. doi: 10.3390/ijms13044896 (PMC3344254; doi:10.3390/ijms13044896)
Supplement: Supplementary file 1 [file ijms-13-04896-s001.pdf]

## Supplementary Material

**Table S1.** The genotype distributions (%) and association of breast cancer risk for rs11638442, rs2073475 and rs16968478.

| SNP        | Model        | Genotype | Control     | Case        | OR (95% CI) <sup>a</sup> | P-value |
|------------|--------------|----------|-------------|-------------|--------------------------|---------|
| rs11638442 | Codominant   | C/C      | 337 (61.7%) | 316 (59.7%) | 1                        | 0.9     |
|            |              | C/G      | 186 (34.1%) | 188 (35.5%) | 1.04 (0.80-1.34)         |         |
|            |              | G/G      | 23 (4.2%)   | 25 (4.7%)   | 1.13 (0.62-2.05)         |         |
|            | Dominant     | C/C      | 337 (61.7%) | 316 (59.7%) | 1                        | 0.72    |
|            |              | C/G-G/G  | 209 (38.3%) | 213 (40.3%) | 1.05 (0.82-1.34)         |         |
|            | Recessive    | C/C-C/G  | 523 (95.8%) | 504 (95.3%) | 1                        | 0.72    |
|            |              | G/G      | 23 (4.2%)   | 25 (4.7%)   | 1.12 (0.62-2.01)         |         |
|            | Overdominant | C/C-G/G  | 360 (65.9%) | 341 (64.5%) | 1                        | 0.84    |
|            |              | C/G      | 186 (34.1%) | 188 (35.5%) | 1.03 (0.80-1.33)         |         |
|            | Log-additive | ---      | ---         | ---         | 1.05 (0.85-1.29)         | 0.67    |
| rs2073475  | Codominant   | G/G      | 180 (33%)   | 162 (30.7%) | 1                        | 0.75    |
|            |              | G/A      | 264 (48.4%) | 261 (49.5%) | 1.08 (0.82-1.43)         |         |
|            |              | A/A      | 102 (18.7%) | 104 (19.7%) | 1.14 (0.80-1.62)         |         |
|            | Dominant     | G/G      | 180 (33%)   | 162 (30.7%) | 1                        | 0.49    |
|            |              | G/A-A/A  | 366 (67%)   | 365 (69.3%) | 1.10 (0.84-1.42)         |         |
|            | Recessive    | G/G-G/A  | 444 (81.3%) | 423 (80.3%) | 1                        | 0.6     |
|            |              | A/A      | 102 (18.7%) | 104 (19.7%) | 1.09 (0.80-1.48)         |         |
|            | Overdominant | G/G-A/A  | 282 (51.6%) | 266 (50.5%) | 1                        | 0.82    |
|            |              | G/A      | 264 (48.4%) | 261 (49.5%) | 1.03 (0.81-1.31)         |         |
|            | Log-additive | ---      | ---         | ---         | 1.07 (0.90-1.27)         | 0.45    |
| rs16968478 | Codominant   | A/A      | 163 (29.9%) | 147 (27.8%) | 1                        | 0.81    |
|            |              | G/A      | 267 (48.9%) | 266 (50.3%) | 1.08 (0.81-1.44)         |         |
|            |              | G/G      | 116 (21.2%) | 116 (21.9%) | 1.11 (0.79-1.57)         |         |
|            | Dominant     | A/A      | 163 (29.9%) | 147 (27.8%) | 1                        | 0.53    |
|            |              | G/A-G/G  | 383 (70.2%) | 382 (72.2%) | 1.09 (0.83-1.43)         |         |
|            | Recessive    | A/A-G/A  | 430 (78.8%) | 413 (78.1%) | 1                        | 0.71    |
|            |              | G/G      | 116 (21.2%) | 116 (21.9%) | 1.06 (0.79-1.42)         |         |
|            | Overdominant | A/A-G/G  | 279 (51.1%) | 263 (49.7%) | 1                        | 0.79    |
|            |              | G/A      | 267 (48.9%) | 266 (50.3%) | 1.03 (0.81-1.32)         |         |
|            | Log-additive | ---      | ---         | ---         | 1.06 (0.89-1.25)         | 0.53    |

a: OR (95% CI) was adjusted for age.

**Table S2.** The results of Hardy-Weinberg equilibrium (HWE) test for all SNPs.

| SNP        | Genotype | Control     | <i>P</i> -value of HWE | Case        | <i>P</i> -value of HWE |
|------------|----------|-------------|------------------------|-------------|------------------------|
| rs2959008  | T/T      | 205 (37.5%) | 0.587                  | 229 (43.2%) | 0.976                  |
|            | C/T      | 264 (48.4%) |                        | 239 (45.1%) |                        |
|            | C/C      | 77 (14.1%)  |                        | 62 (11.7%)  |                        |
| rs2959003  | T/T      | 196 (36%)   | 0.519                  | 218 (41.3%) | 0.852                  |
|            | C/T      | 255 (46.9%) |                        | 241 (45.6%) |                        |
|            | C/C      | 93 (17.1%)  |                        | 69 (13.1%)  |                        |
| rs2279357  | C/C      | 193 (35.4%) | 0.803                  | 164 (30.9%) | 0.403                  |
|            | C/T      | 265 (48.6%) |                        | 253 (47.7%) |                        |
|            | T/T      | 87 (16%)    |                        | 113 (21.3%) |                        |
| rs11638442 | C/C      | 337 (61.7%) | 0.674                  | 316 (59.7%) | 0.660                  |
|            | C/G      | 186 (34.1%) |                        | 188 (35.5%) |                        |
|            | G/G      | 23 (4.2%)   |                        | 25 (4.7%)   |                        |
| rs2073475  | G/G      | 180 (33%)   | 0.765                  | 162 (30.7%) | 0.951                  |
|            | G/A      | 264 (48.4%) |                        | 261 (49.5%) |                        |
|            | A/A      | 102 (18.7%) |                        | 104 (19.7%) |                        |
| rs16968478 | A/A      | 163 (29.9%) | 0.732                  | 147 (27.8%) | 0.834                  |
|            | G/A      | 267 (48.9%) |                        | 266 (50.3%) |                        |
|            | G/G      | 116 (21.2%) |                        | 116 (21.9%) |                        |
